# Supplementary material
Source: PubMed Central journal article supplement (PMC7160267)
Supplement: advancesADV2019000840C-suppl1.pdf [file advancesADV2019000840C-suppl1.pdf]

## Appendix 1. Electronic search strategies

MEDLINE

Host: PubMed

Date: July 2019

1. randomized controlled trial [pt]
2. controlled clinical trial [pt]
3. randomized [tiab]
4. placebo [tiab]
5. drug therapy [sh]
6. randomly [tiab]
7. trial [tiab]
8. groups [tiab])
9. #1 OR #2 OR #3 OR #4 OR #5 OR #6 OR #7 OR #8
10. animals [mh] NOT humans [mh]
11. #9 NOT #10
12. rivaroxaban
13. "Factor Xa Inhibitors"[Mesh]
14. "Factor Xa"[Mesh] OR "Antithrombins"[Mesh] OR "Dabigatran"[Mesh]
15. (thrombin AND inhib\*)
16. oac OR noacs OR doac
17. dabigatran OR melagatran OR factor Xa OR factor 10a OR fXa OR xaban\* OR apixaban  
OR betrixaban OR eribaxaban OR otamixaban OR razaxaban OR rivaroxaban OR  
darexaban OR edoxaban
18. #12 OR #13 OR #14 OR #15 OR #16 OR #17
19. non-surgical
20. nonsurgical
21. stroke
22. cancer
23. "medically-ill"
24. "internal medicine"
25. trauma
26. posttrauma
27. intensive
28. "Internal Medicine"[Mesh]
29. "Medicine"[Mesh]
30. "Critical Care"[Mesh]
31. "Stroke"[Mesh]
32. medical
33. myocardial
34. criticall\*
35. #19 #OR 20#22 OR #23 #OR #24 OR #25 OR #26 OR #27 OR #28 OR #29 OR #30 OR  
#31 OR #32 OR #33 OR #34
36. (lmw OR lmwh OR lmw-heparin OR lmwhs OR lmwh-group OR low-molecular-weight  
OR low-molecular OR "low molecular" OR low-molecular-weight)

37. "Heparin, Low-Molecular-Weight"[Mesh]
38. "Dalteparin"[Mesh]
39. nadroparin OR fraxiparine OR dalteparin OR enoxaparin OR certoparin
40. #36 OR #37 OR #38 OR #39
41. #11 AND #18 AND #35 AND #40

CENTRAL

Host: Wiley

Date: July 2019

1. rivaroxaban
2. [mh "Factor Xa Inhibitors"]
3. [mh "Factor Xa"]
4. [mh Antithrombins]
5. [mh Dabigatran]
6. (thrombin AND inhib\*)
7. oac OR noacs OR doac
8. dabigatran OR melagatran OR factor Xa OR factor 10a OR fXa OR xaban\* OR apixaban OR betrixaban OR eribaxaban OR otamixaban OR razaxaban OR rivaroxaban OR darexaban OR edoxaban
9. #1 OR #2 OR #3 OR #4 OR #5 OR #6 OR #7 OR #8
10. non-surgical
11. nonsurgical
12. stroke
13. cancer
14. "medically-ill"
15. "internal medicine"
16. trauma
17. posttrauma
18. intensive
19. [mh "Internal Medicine"]
20. [mh Medicine]
21. [mh "Critical Care"]
22. [mh Stroke]
23. medical
24. myocardial
25. criticall\*
26. #10 OR #11 OR #12 OR #13 OR #14 #OR #15 OR #16 OR #17 OR #18 OR #19 OR #20 OR #21 OR #22 OR #23 OR #24 OR #25
27. (lmw OR lmwh OR lmw-heparin OR lmwhs OR lmwh-group OR low-molecular-weight OR low-molecular OR "low molecular" OR low-molecular-weight)
28. "[mh "Heparin, Low-Molecular-Weight"]
29. [mh Dalteparin]
30. nadroparin OR fraxiparine OR dalteparin OR enoxaparin OR certoparin
31. #27 OR #28 OR #29
32. #9 AND #26 AND #31

EMBASE

Host: Elsevier

Date: July 2019

1. Factor Xa Inhibitors.mp. or exp blood clotting factor 10a inhibitor/
2. Factor Xa.mp. or exp blood clotting factor 10a/
3. Antithrombins.mp. or exp antithrombin/
4. exp dabigatran/ or Dabigatran.mp.
5. factor 10a.mp.
6. fxa.mp.
7. xaban\*.mp.
8. apixaban.mp. or exp apixaban/
9. betrixaban.mp. or exp betrixaban/
10. eribaxaban.mp. or exp eribaxaban/
11. otamixaban.mp. or exp otamixaban/
12. razaxaban.mp. or exp razaxaban/
13. rivaroxaban.mp. or exp rivaroxaban/
14. darexaban.mp. or exp darexaban/
15. edoxaban.mp. or exp edoxaban/
16. melagatran.mp. or exp melagatran/
17. noacs.mp.
18. oac.mp.
19. DOAC.mp.
20. (thrombin and inhib\*).mp. [mp=title, abstract, heading word, drug trade name, original title, device manufacturer, drug manufacturer, device trade name, keyword, floating subheading]
21. 1 or 2 or 3 or 4 or 5 or 6 or 7 or 8 or 9 or 10 or 11 or 12 or 13 or 14 or 15 or 16 or 17 or 18 or 19 or 20
22. non-surgical.mp.
23. nonsurgical.mp.
24. stroke.mp. or exp cerebrovascular accident/
25. cancer.mp. or exp neoplasm/
26. "medically-ill".mp.
27. internal medicine.mp. or exp internal medicine/
28. trauma.mp.
29. posttrauma.mp.
30. intensive.mp. or exp intensive care/ or intensive care unit/
31. medicine/
32. Critical Care.mp.
33. myocardial.mp.
34. critically ill patient/ or criticall\*.mp.
35. medical.mp.
36. 22 or 23 or 24 or 25 or 26 or 27 or 28 or 29 or 30 or 31 or 32 or 33 or 34 or 35
37. lmw.mp.
38. low molecular weight heparin/ or lmwh.mp.
39. lmw-heparin.mp.

40. lmwhs.mp.
41. lmwh-group.mp.
42. low-molecular-weight.mp.
43. low-molecular.mp.
44. Dalteparin.mp. or dalteparin/
45. nadroparin.mp. or nadroparin/
46. fraxiparine.mp.
47. enoxaparin.mp. or enoxaparin/
48. certoparin.mp. or certoparin/
49. 37 or 38 or 39 or 40 or 41 or 42 or 43 or 44 or 45 or 46 or 47 or 48
50. randomized controlled trial/
51. controlled clinical trial.mp. or controlled clinical trial/
52. randomized.mp. or "randomized controlled trial (topic)"/
53. placebo/ or placebo.mp.
54. drug therapy.mp. or drug therapy/
55. randomly.mp.
56. trial.mp.
57. groups.mp.
58. 50 or 51 or 52 or 53 or 54 or 55 or 56 or 57 or 58
59. animals.mp. or animal/
60. human/
61. 59 or 60
62. 58 not 61
63. 21 and 36 and 49 and 62
